# Supplementary material for: Novel artesunate-metformin conjugate inhibits bladder cancer cell growth associated with Clusterin/SREBP1/FASN signaling pathway
Source: PubMed Central journal article supplement — Korean J Physiol Pharmacol. 2024 May 1;28(3):219–27. doi: 10.4196/kjpp.2024.28.3.219 (PMC11058549; doi:10.4196/kjpp.2024.28.3.219), 2024-05-01
Supplement: kjpp-28-3-219-supple.pdf [file kjpp-28-3-219-supple.pdf]

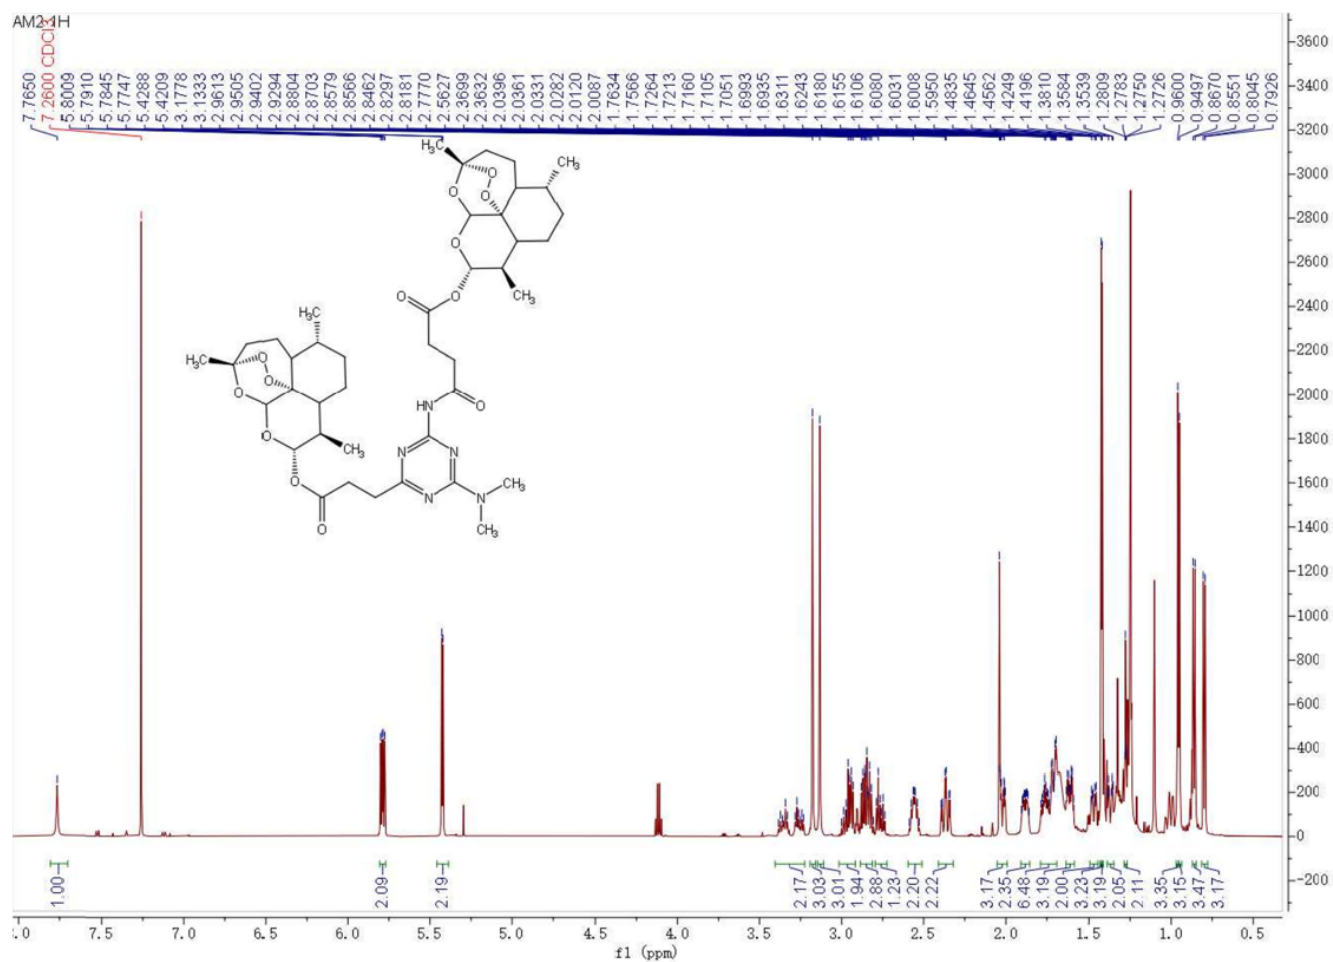

Supplementary Fig. 1. <sup>1</sup>H NMR spectrum of AM2.

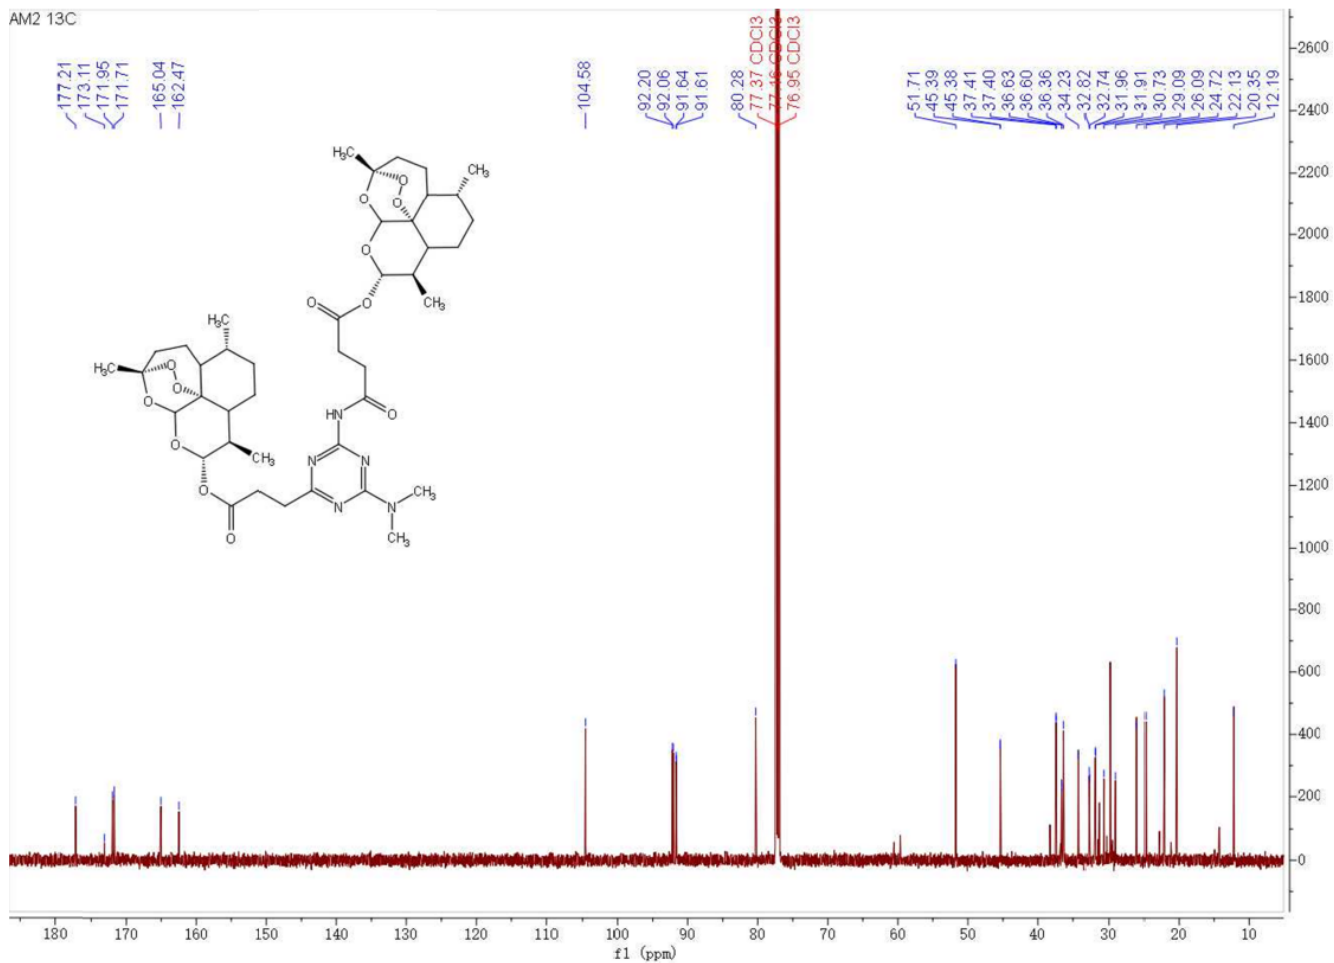

Supplementary Fig. 2. <sup>13</sup>C NMR spectrum of AM2.

**A**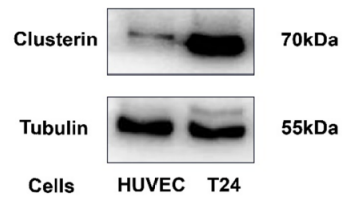**B**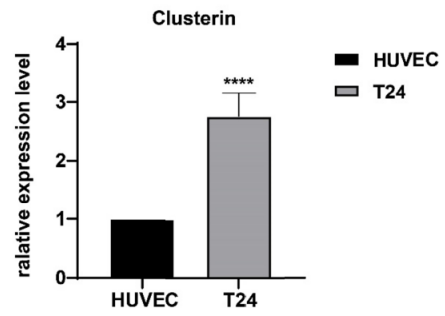

**Supplementary Fig. 3. (A, B) Western blot analysis of Clusterin protein expression in T24 cells and HUVEC cells.** HUVEC, human umbilical vein endothelial cells. \*\*\*\*p < 0.0001.
